# Supplementary material for: Tanaella quintanai, a new deep-water tanaellid (Crustacea: Peracarida: Tanaidacea) from the Colombian Caribbean Coast, with a key to the species of the genus Tanaella Norman & Stebbing, 1886
Source: PeerJ. 2019 Sep 24;7:e7571. doi: 10.7717/peerj.7571 (PMC6764364; doi:10.7717/peerj.7571)
Supplement: File S1 — Geographical information, physicochemical data and specimens of Spyrapodids used in this study. [file peerj-07-7571-s001.xlsx]

## Sheet: Sheet1
Station	Family	Species	Depth (m)	Temperature (°C)	pH	Salinity (ppm)	Dissolved Oxygen (mg/L)	Mud and Clay (%)	Coordinates WGS84		Remarks
									Lat	Long
E05PAC	Tanaellidae	Tanaella quintanai	1598	4.1	8.04	35.0	6.8	95.5	9°14' 3.8" N	76°47' 14.57"W	Female (Holotype)
E13PAC	Tanaellidae	Tanaella quintanai	2423	4.1	7.98	35.0	6.8	94.4	10° 08' 59.42" N	76° 32' 48.77" W	Female
E15PAC	Tanaellidae	Tanaella quintanai	2821	4.1	8.00	35.0	6.7	98.0	10° 22' 0.2" N	76° 27' 5.17" W	Female (dissected)
E04FND	Tanaellidae	Tanaella quintanai	2258	4.1	7.70	34.9	6.8	97.0	10° 26' 55.54" N	76° 15' 25.29" W	Female with marsupium
E06FSD	Tanaellidae	Tanaella quintanai	1659	4.4	7.97	35.0	4.7	94.9	9° 10' 1.14" N	76° 50' 10.18" W	Female
